# Supplementary material for: A Lifelong Impact on Endometriosis: Pathophysiology and Pharmacological Treatment
Source: MDPI journal article supplement (doi:10.3390/ijms24087503), 2023-04-19
Supplement: s1 [file s1]

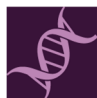

| Endometriotic lesions   |             |          |    |    | <1cm | 1-3cm | >3cm |
|-------------------------|-------------|----------|----|----|------|-------|------|
| Peritoneum              | Superficial | 1        | 2  | 4  |      |       |      |
|                         | Deep        | 2        | 4  | 6  |      |       |      |
| Ovary, right            | Superficial | 1        | 2  | 4  |      |       |      |
|                         | Deep        | 4        | 16 | 20 |      |       |      |
| Ovary, left             | Superficial | 1        | 2  | 4  |      |       |      |
|                         | Deep        | 4        | 16 | 20 |      |       |      |
| Cul-de-sac obliteration | Partial     | Complete |    |    |      |       |      |
|                         | 4           | 40       |    |    |      |       |      |

| rASRM stage          |  | Total score |
|----------------------|--|-------------|
| Stage I (Minimal)    |  | 1-5         |
| Stage II (Mild)      |  | 6-15        |
| Stage III (Moderate) |  | 16-40       |
| Stage IV (Severe)    |  | >40         |

\* If the fimbriated end of the fallopian tube is completely enclosed, change the point assignment to 16.

| Adhesions    |       | <1/3 Enclosure | 1/3-2/3 Enclosure | >2/3 Enclosure |
|--------------|-------|----------------|-------------------|----------------|
| Ovary, right | Filmy | 1              | 2                 | 4              |
|              | Dense | 4              | 8                 | 16             |
| Ovary, left  | Filmy | 1              | 2                 | 4              |
|              | Dense | 4*             | 8*                | 16             |
| Tube, right  | Filmy | 1              | 2                 | 4              |
|              | Dense | 4*             | 8*                | 16             |
| Tube, left   | Filmy | 1              | 2                 | 4              |
|              | Dense | 4              | 8                 | 16             |

**Figure S1.** The severity of pelvic endometriosis. After surgical intervention, the severity of pelvic endometriosis can be determined using the revised scoring system of the American Society for Reproductive Medicine (ASRM).
